# Supplementary material for: A multiscale agent-based framework integrated with a constraint-based metabolic network model of cancer for simulating avascular tumor growth
Source: Royal Society of Chemistry journal article supplement (doi:10.1039/c7mb00050b), 2017-07-24

## Supplementary Figure S2

### Ghadiri et al., “A multiscale agent-based framework integrated with a constraint-based metabolic network model of cancer for simulating avascular tumor growth”

**Figure S2:** Profile of normalized concentration of (A) oxygen and (B) glucose through tumor's central section over time.

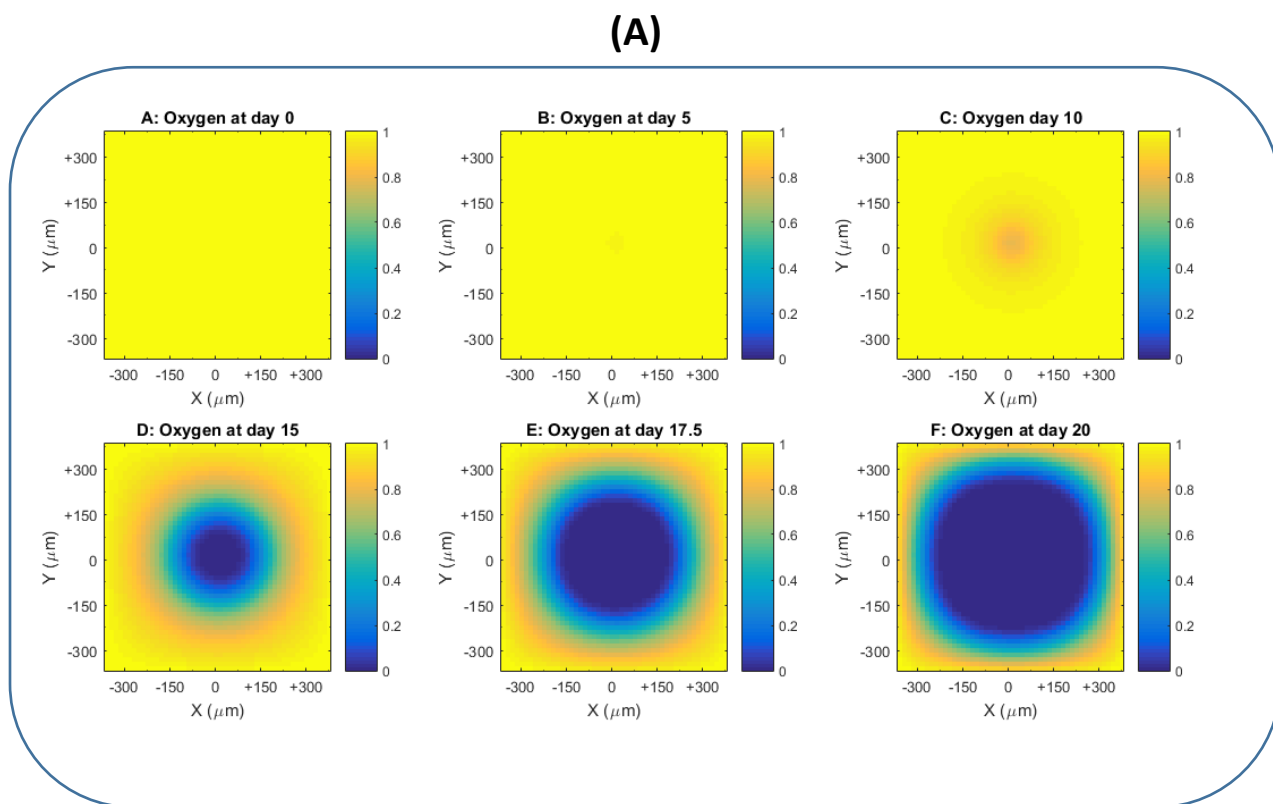

(B)

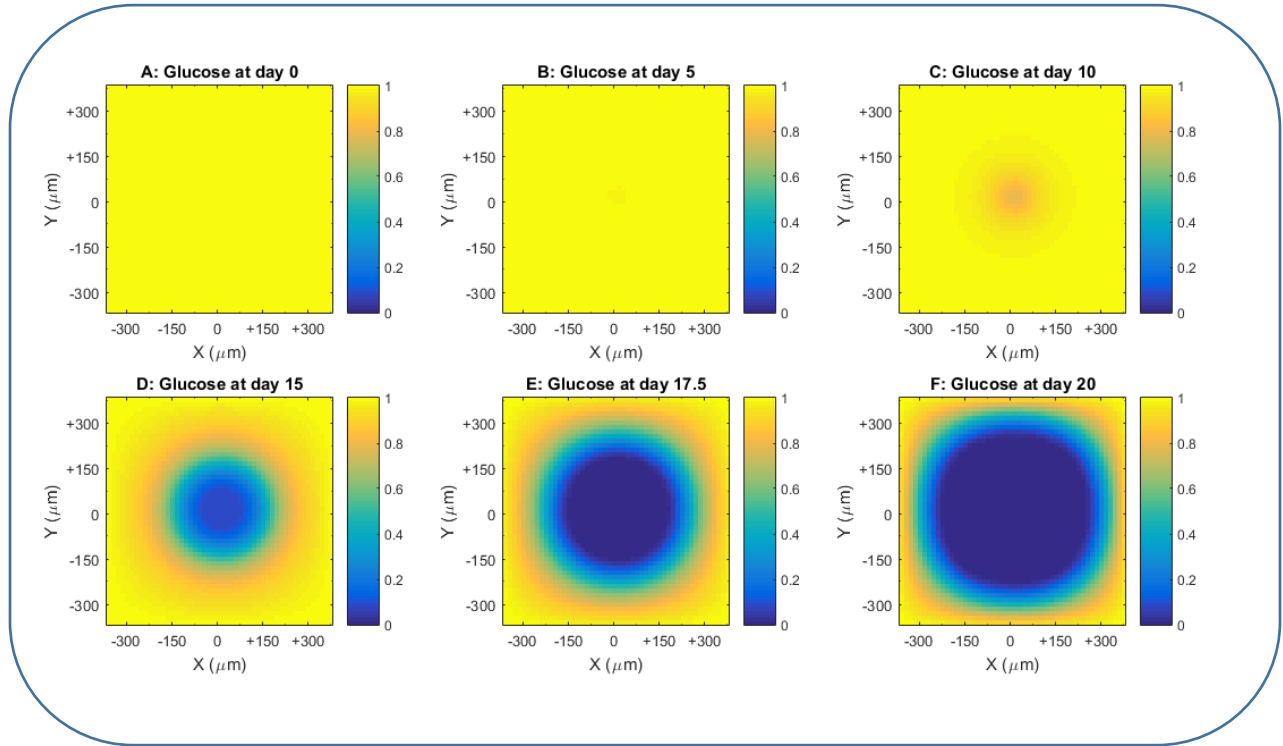

Supplement: c7mb00050b2.pdf [file c7mb00050b2.pdf]
