# Supplementary material for: A multiscale agent-based framework integrated with a constraint-based metabolic network model of cancer for simulating avascular tumor growth
Source: Royal Society of Chemistry journal article supplement (doi:10.1039/c7mb00050b), 2017-07-24
Supplement: c7mb00050b4.pdf [file c7mb00050b4.pdf]

## Supplementary File S1

### Ghadiri et al., “A multiscale agent-based framework integrated with a constraint-based metabolic network model of cancer for simulating avascular tumor growth”

**File S1:** Proof of the necrosis probability equation:

Let  $n$  be the number of simulation steps corresponding to the half-life of cancer cells. One can simply observe that if we assume that the probability of necrosis of each starved cell in one step is  $1 - 2^{-1/n}$ , then the probability of being alive for each starved cell in half-life time must be 0.5.

$$P_{\text{necrosis}} = 1 - 2^{-1/n} \Rightarrow P_{\text{alive}} = 2^{-1/n} \Rightarrow P_{\text{alive\_after\_n\_steps}} = (2^{-1/n})^n = 2^{-1} = 0.5$$

Hence, after this period of time (i.e.,  $n$  simulation steps), half of the starved cells will be dead.
