# Supplementary material for: A multiscale agent-based framework integrated with a constraint-based metabolic network model of cancer for simulating avascular tumor growth
Source: Royal Society of Chemistry journal article supplement (doi:10.1039/c7mb00050b), 2017-07-24
Supplement: c7mb00050b7.xlsx [file c7mb00050b7.xlsx]

## Sheet: Sheet1
Ghadiri et al., “A multiscale agent-based framework integrated with a constraint-based metabolic network model of cancer for simulating avascular tumor growth”
Table S1: List of the metabolites constituting biomass. The formula of biomass production reaction is as follows: biomass constituting metabolites + 43.153 ATP + 43.153 H2O → 43.153 ADP + 43.153 H+ + 43.153 Pi + BIOMASS
metabolite	coefficient
'L-Alanine'	0.420217
'AMP'	0.019636
'L-Arginine'	0.003282
'L-Asparagine'	0.042678
'L-Aspartate'	2.45237
'Cholesterol'	0.029279
'CMP'	0.032723
'L-Cysteine'	0.004269
'diacylglycerol (homo sapiens)'	0.01114
'dAMP'	0.00805
'dCMP'	0.005367
'dGMP'	0.005367
'dTMP'	0.00805
'L-Glutamine'	0.676289
'L-Glutamate'	0.594216
'Glycine'	0.492442
'glycogen, structure 1 (glycogenin-11[1,4-Glc])'	0.939899
'GMP'	0.037088
'L-Histidine'	0.10177
'L-Isoleucine'	0.013133
'L-Leucine'	0.039396
'lysophosphatidylcholine (homo sapiens)'	0.004474
'L-Lysine'	0.032829
'monoacylglycerol 2 (homo sapiens)'	0.013664
'L-Methionine'	0.006567
'phosphatidic acid (homo sapiens)'	0.058105
'phosphatidylinositol (homo sapiens)'	0.010963
'Phosphatidylcholine (homo sapiens)'	0.060784
'phosphatidylethanolamine (homo sapiens)'	0.07098
'L-Phenylalanine'	0.013133
'L-Proline'	0.063691
'phosphatidylserine (homo sapiens)'	0.020854
'L-Serine'	0.131318
'sphingomyelin (homo sapiens)'	0.008545
'triacylglycerol (homo sapiens)'	0.097285
'L-Threonine'	0.072226
'L-Tryptophan'	0.003282
'L-Tyrosine'	0.019696
'UMP'	0.019636
'L-Valine'	0.042678
'cholesterol ester'	0.023261
