# Supplementary material for: A multiscale agent-based framework integrated with a constraint-based metabolic network model of cancer for simulating avascular tumor growth
Source: Royal Society of Chemistry journal article supplement (doi:10.1039/c7mb00050b), 2017-07-24
Supplement: c7mb00050b8.xlsx [file c7mb00050b8.xlsx]

## Sheet: Sheet1
Ghadiri et al., “A multiscale agent-based framework integrated with a constraint-based metabolic network model of cancer for simulating avascular tumor growth”
Table S2: List of the reactions which are predicted to be significantly less active in the tumor's core (the absolute value of their possible flux obtained by FVA is less) in comparison to its outer layers.
reaction	reaction formula	name of the reaction	type				name of the reaction	name of the reaction
1	'h[m] + ps_hs[m] -> co2[m] + pe_hs[m] '	'Phosphatidylserine decarboxylase'	lipid metabolism				'Phosphatidylserine decarboxylase'	'Phosphate exchange'
2	'ade[e] <=> ade[c] '	'adenine reversible transport, cytosol'	exchange rxn				'adenine reversible transport, cytosol'	'glycogenin self-glucosylation'
3	'Rtotal3coa[c] + dag_hs[c] -> coa[c] + tag_hs[c] '	'diacylglycerol acyltransferase'	lipid metabolism				'diacylglycerol acyltransferase'	'cystathionine beta-synthase'
4	'orot5p[c] + ppi[c] <=> orot[c] + prpp[c] '	orotate phosphoribosyltransferase'	nucleotide synthesis				orotate phosphoribosyltransferase'	'phosphatidylethanolamine scramblase'
5	'vitd3[e] <=> '	'Vitamin D3 exchange'	exchange rxn				'Vitamin D3 exchange'	' 2-Hydroxybutyrate exchange'
6	'accoa[c] + atp[c] + hco3[c] -> adp[c] + h[c] + malcoa[c] + pi[c] '	'acetyl-CoA carboxylase'	lipid metabolism				'acetyl-CoA carboxylase'	'aspartate carbamoyltransferase (reversible)'
7	'dhor-S[c] + h2o[c] <=> cbasp[c] + h[c] '	'dihydroorotase'	nucleotide synthesis				'dihydroorotase'	'phosphatidylinositol synthase (Homo sapiens)'
8	'atp[c] + glu-L[c] + nh4[c] -> adp[c] + gln-L[c] + h[c] + pi[c] '	'glutamine synthetase'	amino acid synthesis				'glutamine synthetase'	'R group to palmitate conversion'
9	'Rtotal2coa[c] + alpa_hs[c] -> coa[c] + pa_hs[c] '	' 1-acylglycerol-3-phosphate O-acyltransferase 1'	lipid metabolism				' 1-acylglycerol-3-phosphate O-acyltransferase 1'	'L-Phenylalanine,tetrahydrobiopterin:oxygen oxidoreductase (4-hydroxylating)'
10	'h2o[c] + mi1p-D[c] -> inost[c] + pi[c] '	'myo-inositol 1-phosphatase'	lipid metabolism				'myo-inositol 1-phosphatase'	'o2 transport (diffusion)'
11	'thbpt4acam[c] -> dhbpt[c] + h2o[c] '	'Tetrahydrobiopterin-4a-carbinolamine dehydratase'	amino acid synthesis				'Tetrahydrobiopterin-4a-carbinolamine dehydratase'	'carboxylic acid dissociation'
12	'g6p[c] -> mi1p-D[c] '	'myo-Inositol-1-phosphate synthase'	lipid metabolism				'myo-Inositol-1-phosphate synthase'	'cholesterol precursor intracellular transport'
13	'g1p[c] <=> g6p[c] '	'phosphoglucomutase'	glycogenesis				'phosphoglucomutase'	'ribose-5-phosphate isomerase'
14	'ahcys[c] + h2o[c] <=> adn[c] + hcys-L[c] '	'adenosylhomocysteinase'	amino acid synthesis				'adenosylhomocysteinase'	'dihydrosphingosine N-acyltransferase'
15	'h[c] + orot5p[c] -> co2[c] + ump[c] '	'orotidine-5''-phosphate decarboxylase'	nucleotide synthesis				'orotidine-5''-phosphate decarboxylase'	'dihydrofolate reductase'
16	'atp[c] + h2o[c] + ps_hs[c] -> adp[c] + h[c] + pi[c] + ps_hs[m] '	'phosphatidylserine flippase'	amino acid synthesis/ lipid metabolism				'phosphatidylserine flippase'	'sph1p transport'
17	'atp[c] + dgmp[c] <=> adp[c] + dgdp[c] '	'deoxyguanylate kinase (dGMP:ATP)'	nucleotide synthesis				'deoxyguanylate kinase (dGMP:ATP)'	'R group to palmitate conversion'
18	'glc-D[e] <=> '	'D-Glucose exchange'	exchange rxn				'D-Glucose exchange'	'Vitamin D3 formation'
19	'3pg[c] + nad[c] -> 3php[c] + h[c] + nadh[c] '	'phosphoglycerate dehydrogenase'	amino acid synthesis				'phosphoglycerate dehydrogenase'	' 2-hydroxybutyrate cotransport with proton'
20	'atp[c] + h2o[c] + met-L[c] -> amet[c] + pi[c] + ppi[c] '	'methionine adenosyltransferase'	amino acid metabolism				'methionine adenosyltransferase'	'phosphoserine phosphatase (L-serine)'
21	'chsterol[c] <=> chsterol[m] '	'cholesterol intracellular transport'	transport rxn				'cholesterol intracellular transport'	'asparagine synthase (glutamine-hydrolysing)'
22	'7dhchsterol[c] <=> pd3[c] '	'Previtamin D3 formation'	cholesterol synthesis				'Previtamin D3 formation'	'glycerol-3-phosphate acyltransferase'
23	'chsterol[r] <=> chsterol[m] '	'cholesterol intracellular transport'	transport rxn				'cholesterol intracellular transport'	'phosphoserine transaminase'
24	'atp[c] + gln-L[c] + h2o[c] + xmp[c] -> amp[c] + glu-L[c] + gmp[c] + 2 h[c] + ppi[c] '	'GMP synthase'	nucleotide synthesis				'GMP synthase'	'O2 exchange'
25	'dhbpt[c] + h[c] + nadh[c] -> nad[c] + thbpt[c] '	' 6,7-dihydropteridine reductase'	amino acid synthesis				' 6,7-dihydropteridine reductase'	'IMP dehydrogenase'
26	'co2[c] + h2o[c] <=> h2co3[c] '	'carboxylic acid dissociation'	proton/bicarbonate				'carboxylic acid dissociation'	'cytochrome c oxidase, mitochondrial Complex IV'
27	'h[c] + nadph[c] + trdox[c] -> nadp[c] + trdrd[c] '	'thioredoxin reductase (NADPH)'	oxidoreductive				'thioredoxin reductase (NADPH)'	'glycogen synthase (ggn -> glygn1)'
28	'7dhchsterol[r] + h[r] + nadph[r] -> chsterol[r] + nadp[r] '	' 7-dehydrocholesterol reductase'	cholesterol synthesis				' 7-dehydrocholesterol reductase'	'Sphinganine 1-phosphate exchange'
29	'atp[c] + r5p[c] <=> amp[c] + h[c] + prpp[c] '	'phosphoribosylpyrophosphate synthetase'	nucleotide synthesis/amino acid synthesis				'phosphoribosylpyrophosphate synthetase'	'sphingoid base-phosphate phosphatase (sphinganine 1-phosphatase), endoplasmic reticulum'
30	'ade[e] <=> '	'Adenine exchange'	exchange rxn				'Adenine exchange'	'cystathionine g-lyase'
31	'2 atp[c] + gln-L[c] + h2o[c] + hco3[c] -> 2 adp[c] + cbp[c] + glu-L[c] + 2 h[c] + pi[c] '	'carbamoyl-phosphate synthase (glutamine-hydrolysing)'	nucleotide synthesis/amino acid synthesis				'carbamoyl-phosphate synthase (glutamine-hydrolysing)'	'UP_Tyr-ggn[c]'
32	'dhor-S[c] + q10[m] -> orot[c] + q10h2[m] '	'dihydoorotic acid dehydrogenase (quinone10)'	nucleotide synthesis				'dihydoorotic acid dehydrogenase (quinone10)'	'BIOMASS'
33	'pi[e] <=> '	'Phosphate exchange'	exchange rxn
34	'Tyr-ggn[c] + 8 udpg[c] -> ggn[c] + 8 h[c] + 8 udp[c] '	'glycogenin self-glucosylation'	glycogenesis
35	'hcys-L[c] + ser-L[c] -> cyst-L[c] + h2o[c] '	'cystathionine beta-synthase'	amino acid synthesis
36	'pe_hs[c] <=> pe_hs[m] '	'phosphatidylethanolamine scramblase'	scramblase
37	'2hb[e] <=> '	' 2-Hydroxybutyrate exchange'	transport/ amino acid synthesis
38	'asp-L[c] + cbp[c] <=> cbasp[c] + h[c] + pi[c] '	'aspartate carbamoyltransferase (reversible)'	nucleotide synthesis
39	'cdpdag_hs[c] + inost[c] <=> cmp[c] + h[c] + pail_hs[c] '	'phosphatidylinositol synthase (Homo sapiens)'	lipid metabolism
40	'Rtotal2coa[c] <=> pmtcoa[c] '	'R group to palmitate conversion'	lipid metabolism
41	'o2[c] + phe-L[c] + thbpt[c] -> thbpt4acam[c] + tyr-L[c] '	'L-Phenylalanine,tetrahydrobiopterin:oxygen oxidoreductase (4-hydroxylating)'	amino acid synthesis
42	'2hb[c] + nad[c] <=> 2obut[c] + h[c] + nadh[c] '	' 2-Hydroxybutyrate:NAD+ oxidoreductase'	amino acid synthesis
43	'h[c] + hco3[c] <=> h2co3[c] '	'carboxylic acid dissociation'	proton/bicarbonate
44	'7dhchsterol[r] <=> 7dhchsterol[c] '	'cholesterol precursor intracellular transport'	transport rxn
45	'r5p[c] <=> ru5p-D[c] '	'ribose-5-phosphate isomerase'	nucleotide synthesis
46	'dhf[c] + h[c] + nadph[c] <=> nadp[c] + thf[c] '	'dihydrofolate reductase'	nucleotide synthesis
47	'Rtotal3coa[c] <=> pmtcoa[c] '	'R group to palmitate conversion'	lipid metabolism
48	'pd3[c] <=> vitd3[c] '	'Vitamin D3 formation'	cholesterol synthesis
49	'2hb[e] + h[e] <=> 2hb[c] + h[c] '	' 2-hydroxybutyrate cotransport with proton'	exchange rxn
50	'dag_hs[c] + h2o[c] -> Rtotal[c] + h[c] + mag_hs[c] '	'lipase'	lipid metabolism
51	'h2o[c] + pser-L[c] -> pi[c] + ser-L[c] '	'phosphoserine phosphatase (L-serine)'	amino acid synthesis
52	'asp-L[c] + atp[c] + gln-L[c] + h2o[c] -> amp[c] + asn-L[c] + glu-L[c] + h[c] + ppi[c] '	'asparagine synthase (glutamine-hydrolysing)'	amino acid synthesis
53	'Rtotalcoa[c] + glyc3p[c] -> alpa_hs[c] + coa[c] '	'glycerol-3-phosphate acyltransferase'	lipid metabolism
54	'3php[c] + glu-L[c] -> akg[c] + pser-L[c] '	'phosphoserine transaminase'	amino acid synthesis
55	'h2o[c] + imp[c] + nad[c] -> h[c] + nadh[c] + xmp[c] '	'IMP dehydrogenase'	nucleotide synthesis
56	'ggn[c] + 3 udpg[c] -> glygn1[c] + 3 h[c] + 3 udp[c] '	'glycogen synthase (ggn -> glygn1)'	glycogenesis
57	'R1coa_hs[c] + chsterol[c] -> coa[c] + xolest_hs[c] '	'sterol O-acyltransferase (acyl-Coenzyme A: cholesterol acyltransferase) 1'	cholesterol ester synthesis
58	'dump[c] + mlthf[c] -> dhf[c] + dtmp[c] '	'thymidylate synthase'	nucleotide synthesis
59	'cyst-L[c] + h2o[c] -> 2obut[c] + cys-L[c] + nh4[c] '	'cystathionine g-lyase'	amino acid synthesis
60	' -> Tyr-ggn[c] '	'UP_Tyr-ggn[c]'	glycogenesis
61	0.42022 ala-L[c] + 0.019636 amp[c] + 0.003282 arg-L[c] + 0.042678 asn-L[c] + 2.4524 asp-L[c] + 43.153 atp[c] + 0.029279 chsterol[c] + 0.032723 cmp[c] + 0.004269 cys-L[c] + 0.01114 dag_hs[c] + 0.00805 damp[c] + 0.005367 dcmp[c] + 0.005367 dgmp[c] + 0.00805 dtmp[c] + 0.67629 gln-L[c] + 0.59422 glu-L[c] + 0.49244 gly[c] + 0.9399 glygn1[c] + 0.037088 gmp[c] + 43.153 h2o[c] + 0.10177 his-L[c] + 0.0131…	'BIOMASS'	biomass
